# Supplementary material for: Antibiotic Use Prior to COVID-19 Vaccine Is Associated with Higher Risk of COVID-19 and Adverse Outcomes: A Propensity-Scored Matched Territory-Wide Cohort
Source: MDPI journal article supplement (doi:10.3390/vaccines11081341), 2023-08-08
Supplement: s1 [file s1]

**Figure S1. Patient selection flow chart**

**Three-dose vaccine recipients**

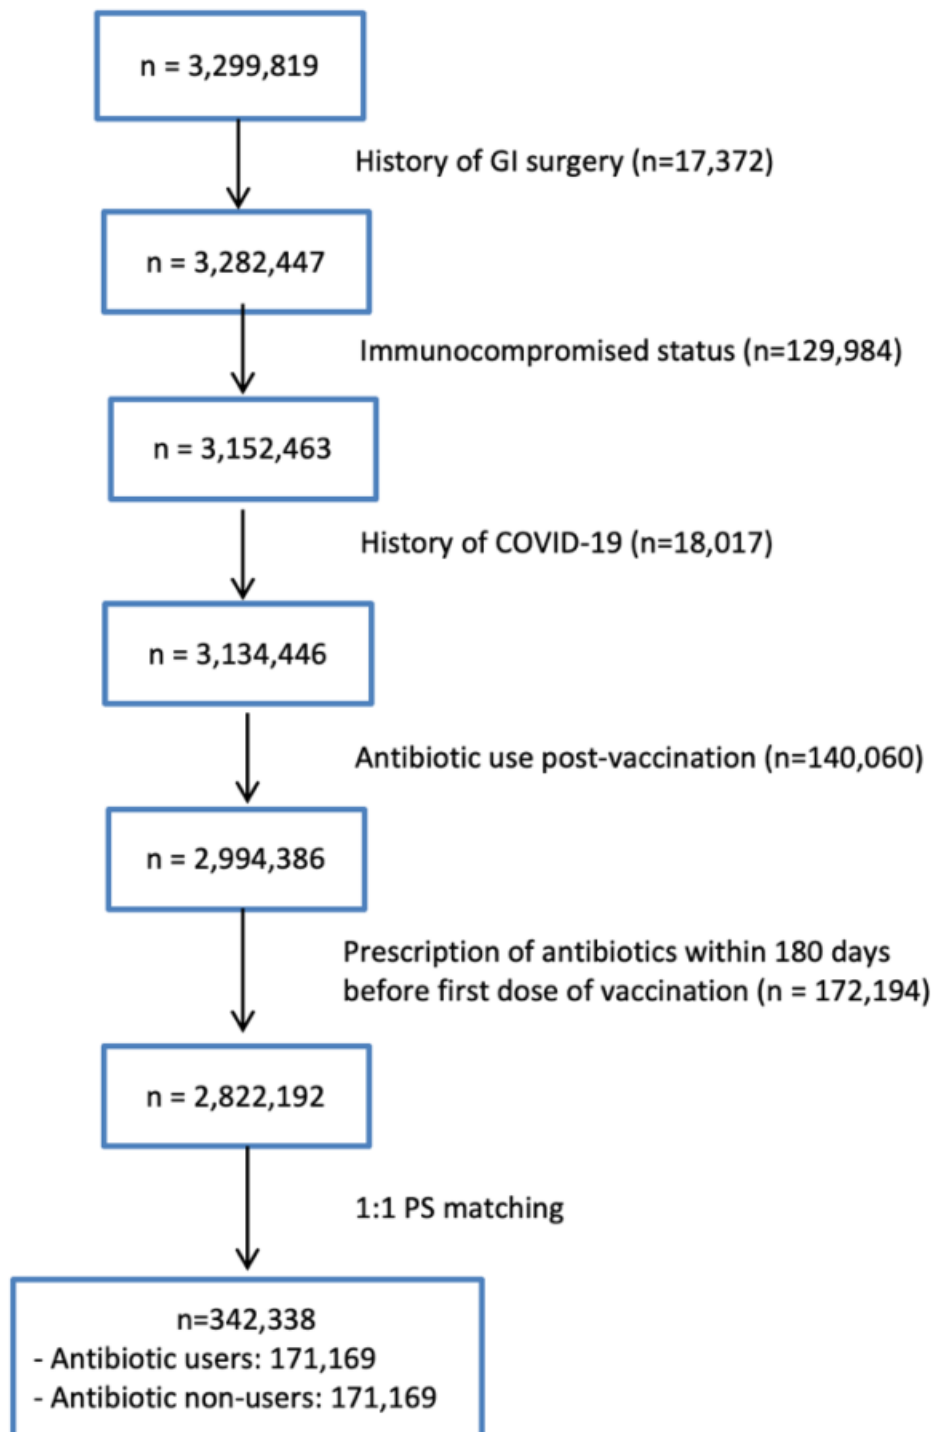

Abbreviations: GI, gastrointestinal; PS, propensity score

**Table S1. Baseline characteristics of pre-vaccination antibiotic users and non-users before propensity score matching**

|                                                  | Pre-vaccination<br>antibiotic non-users<br>(n=2,822,192) | Pre-vaccination<br>antibiotic users<br>(n=172,194) | SMD    |
|--------------------------------------------------|----------------------------------------------------------|----------------------------------------------------|--------|
| Age, years (mean (SD))                           | 53.18 (17.4)                                             | 57.70 (19.2)                                       | 0.247  |
| Sex, male (%)                                    | 1257206 (44.5)                                           | 78307 (45.5)                                       | 0.019  |
| Charlson Comorbidity Index (mean (SD))           | 0.19 (0.5)                                               | 0.42 (0.8)                                         | 0.338  |
| Vaccine platform - CoronaVac (%)                 | 1383371 (49.0)                                           | 93930 (54.5)                                       | 0.111  |
| Received 3 <sup>rd</sup> dose (%)                | 1.00 (0.0)                                               | 1.00 (0.0)                                         | <0.001 |
| <b>Comorbidities – no. (%)</b>                   |                                                          |                                                    |        |
| Hypertension                                     | 623388 (22.1)                                            | 51870 (30.1)                                       | 0.184  |
| Diabetes mellitus                                | 302934 (10.7)                                            | 26720 (15.5)                                       | 0.142  |
| Dyslipidemia                                     | 386163 (13.7)                                            | 29597 (17.2)                                       | 0.097  |
| Cardiovascular diseases                          | 665681 (23.6)                                            | 58098 (33.7)                                       | 0.226  |
| Respiratory diseases                             | 39219 (1.4)                                              | 9924 (5.8)                                         | 0.237  |
| Obesity diagnosis                                | 115041 (4.1)                                             | 8697 (5.1)                                         | 0.047  |
| Smoking                                          | 25466 (0.9)                                              | 2342 (1.4)                                         | 0.043  |
| Alcohol use disorders                            | 7738 (0.3)                                               | 1096 (0.6)                                         | 0.054  |
| Ulcers                                           | 19689 (0.7)                                              | 4035 (2.3)                                         | 0.135  |
| Moderate-severe liver disease                    | 1218 (0.0)                                               | 388 (0.2)                                          | 0.050  |
| Chronic renal failure                            | 19664 (0.7)                                              | 3586 (2.1)                                         | 0.119  |
| <b>Medication use in past 6 months – no. (%)</b> |                                                          |                                                    |        |
| ACEIs                                            | 180282 (6.4)                                             | 15904 (9.2)                                        | 0.106  |
| ARBs                                             | 202335 (7.2)                                             | 18309 (10.6)                                       | 0.122  |
| Metformin                                        | 272156 (9.6)                                             | 21490 (12.5)                                       | 0.091  |
| Lipid lowering agents                            | 547298 (19.4)                                            | 46558 (27.0)                                       | 0.182  |
| Antiplatelets                                    | 196034 (6.9)                                             | 23520 (13.7)                                       | 0.222  |
| NSAIDs                                           | 143631 (5.1)                                             | 26609 (15.5)                                       | 0.346  |
| Oral anticoagulants                              | 24595 (0.9)                                              | 5056 (2.9)                                         | 0.152  |
| Steroids                                         | 6506 (0.2)                                               | 5063 (2.9)                                         | 0.218  |
| Antidepressants                                  | 111354 (3.9)                                             | 13145 (7.6)                                        | 0.158  |
| Antiviral drugs                                  | 30518 (1.1)                                              | 3305 (1.9)                                         | 0.069  |
| PPIs                                             | 187323 (6.6)                                             | 37412 (21.7)                                       | 0.443  |
| H2RAs                                            | 280432 (9.9)                                             | 38856 (22.6)                                       | 0.347  |

SMD: standardized mean difference, SD: standard deviation, ACEIs: angiotensin-converting enzyme inhibitors, ARBs: angiotensin receptor blockers, NSAIDs: non-steroidal anti-inflammatory drugs, PPIs: proton pump inhibitors, H2RAs: H2 receptor antagonists

**Table S2. Anti-anaerobic/anti-aerobic activity and anti-bacterial spectrum of various classes of antibiotics**

| Class                        | Route         | Anti-anaerobic/<br>anti-aerobic activity | Anti-bacterial<br>spectrum |
|------------------------------|---------------|------------------------------------------|----------------------------|
| <i>Penicillins</i>           |               |                                          |                            |
| Benzylpenicillin             | Intravenous   | Anti-aerobic                             | Narrow spectrum            |
| Phenoxymethylpenicillin      | Oral          | Anti-aerobic                             | Narrow spectrum            |
| Benzathine penicillin G      | Intramuscular | Anti-aerobic                             | Narrow spectrum            |
| Penicillin G procaine        | Intramuscular | Anti-aerobic                             | Narrow spectrum            |
| Cloxacillin                  | Oral          | Anti-aerobic                             | Narrow spectrum            |
|                              | Intravenous   | Anti-aerobic                             | Narrow spectrum            |
| Flucloxacillin               | Oral          | Anti-aerobic                             | Narrow spectrum            |
|                              | Intravenous   | Anti-aerobic                             | Narrow spectrum            |
| Amoxycillin +/- clavulanate  | Oral          | Anti-anaerobic                           | Broad spectrum             |
|                              | Intravenous   | Anti-anaerobic                           | Broad spectrum             |
| Ampicillin +/- sulbactam     | Oral          | Anti-anaerobic                           | Broad spectrum             |
|                              | Intravenous   | Anti-anaerobic                           | Broad spectrum             |
| Piperacillin +/- tazobactam  | Oral          | Anti-anaerobic                           | Broad spectrum             |
|                              | Intravenous   | Anti-anaerobic                           | Broad spectrum             |
| Ticarcillin + clavulanate    | Oral          | Anti-anaerobic                           | Broad spectrum             |
|                              | Intravenous   | Anti-anaerobic                           | Broad spectrum             |
| <i>Cephalosporins</i>        |               |                                          |                            |
| Cefazolin                    | Intravenous   | Anti-aerobic                             | Narrow spectrum            |
| Cefuroxime                   | Oral          | Anti-aerobic                             | Broad spectrum             |
|                              | Intravenous   | Anti-aerobic                             | Broad spectrum             |
| Ceftibuten                   | Oral          | Anti-aerobic                             | Broad spectrum             |
| Ceftazidime                  | Intravenous   | Anti-aerobic                             | Broad spectrum             |
| Ceftriaxone                  | Intravenous   | Anti-aerobic                             | Broad spectrum             |
|                              | Intramuscular | Anti-aerobic                             | Broad spectrum             |
| Cefotaxime                   | Intravenous   | Anti-aerobic                             | Broad spectrum             |
| Cefepime                     | Intravenous   | Anti-aerobic                             | Broad spectrum             |
| Cefaclor                     | Oral          | Anti-anaerobic                           | Broad spectrum             |
| Cefoperazone + Sulbactam     | Intravenous   | Anti-anaerobic                           | Broad spectrum             |
| Cefoxitin                    | Intravenous   | Anti-anaerobic                           | Broad spectrum             |
| Ceftaroline                  | Intravenous   | Anti-anaerobic                           | Broad spectrum             |
| <i>Macrolides</i>            |               |                                          |                            |
| Azithromycin                 | Oral          | Anti-aerobic                             | Narrow spectrum            |
|                              | Intravenous   | Anti-aerobic                             | Narrow spectrum            |
| Erythromycin                 | Oral          | Anti-aerobic                             | Narrow spectrum            |
|                              | Intravenous   | Anti-aerobic                             | Narrow spectrum            |
| Clarithromycin               | Oral          | Anti-aerobic                             | Narrow spectrum            |
|                              | Intravenous   | Anti-aerobic                             | Narrow spectrum            |
| <i>Carbapenems</i>           |               |                                          |                            |
| Imipenem + cilastatin sodium | Intravenous   | Anti-anaerobic                           | Broad spectrum             |
| Ertapenem                    | Intravenous   | Anti-anaerobic                           | Broad spectrum             |
| Meropenem                    | Intravenous   | Anti-anaerobic                           | Broad spectrum             |
| <i>Monobactams</i>           |               |                                          |                            |
| Aztreonam                    | Intravenous   | Anti-aerobic                             | Narrow spectrum            |
| <i>Quinolones</i>            |               |                                          |                            |
| Ciprofloxacin                | Oral          | Anti-aerobic                             | Broad spectrum             |
|                              | Intravenous   | Anti-aerobic                             | Broad spectrum             |
| Levofloxacin                 | Oral          | Anti-aerobic                             | Broad spectrum             |
|                              | Intravenous   | Anti-aerobic                             | Broad spectrum             |
| Moxifloxacin                 | Oral          | Anti-anaerobic                           | Broad spectrum             |
|                              | Intravenous   | Anti-anaerobic                           | Broad spectrum             |

|                        |               |                |                 |
|------------------------|---------------|----------------|-----------------|
| <i>Tetracyclines</i>   |               |                |                 |
| Tetracycline           | Oral          | Anti-aerobic   | Broad spectrum  |
|                        | Intravenous   | Anti-aerobic   | Broad spectrum  |
| Doxycycline            | Oral          | Anti-aerobic   | Broad spectrum  |
|                        | Intravenous   | Anti-aerobic   | Broad spectrum  |
| Minocycline            | Oral          | Anti-aerobic   | Broad spectrum  |
|                        | Intravenous   | Anti-aerobic   | Broad spectrum  |
| Tigecyclines           | Intravenous   | Anti-anaerobic | Broad spectrum  |
| Oxytetracycline        | Oral          | Anti-aerobic   | Broad spectrum  |
|                        | Intravenous   | Anti-aerobic   | Broad spectrum  |
|                        | Intramuscular | Anti-aerobic   | Broad spectrum  |
| <i>Aminoglycosides</i> |               |                |                 |
| Gentamicin             | Intravenous   | Anti-aerobic   | Broad spectrum  |
| Amikacin               | Intravenous   | Anti-aerobic   | Broad spectrum  |
| Neomycin               | Oral          | Anti-aerobic   | Broad spectrum  |
| Tobramycin             | Oral          | Anti-aerobic   | Broad spectrum  |
|                        | Intravenous   | Anti-aerobic   | Broad spectrum  |
| Streptomycin           | Intravenous   | Anti-aerobic   | Narrow spectrum |
| <i>Nitroimidazoles</i> |               |                |                 |
| Metronidazole          | Oral          | Anti-anaerobic | Broad spectrum  |
|                        | Intravenous   | Anti-anaerobic | Broad spectrum  |
| Tinidazole             | Oral          | Anti-anaerobic | Broad spectrum  |
| <i>Glycopeptides</i>   |               |                |                 |
| Vancomycin             | Oral          | Anti-aerobic   | Narrow spectrum |
|                        | Intravenous   | Anti-aerobic   | Narrow spectrum |
| Teicoplanin            | Intravenous   | Anti-aerobic   | Narrow spectrum |
| <i>Others</i>          |               |                |                 |
| Clindamycin            | Oral          | Anti-anaerobic | Narrow spectrum |
|                        | Intravenous   | Anti-anaerobic | Narrow spectrum |
| Linezolid              | Oral          | Anti-anaerobic | Narrow spectrum |
|                        | Intravenous   | Anti-anaerobic | Narrow spectrum |
| Seprin                 | Oral          | Anti-anaerobic | Broad spectrum  |
|                        | Intravenous   | Anti-anaerobic | Broad spectrum  |
|                        |               |                |                 |
| Nitrofurantoin         | Oral          | Anti-aerobic   | Narrow spectrum |
| Rifampicin             | Oral          | Anti-anaerobic | Broad spectrum  |
|                        | Intravenous   | Anti-anaerobic | Broad spectrum  |
| Rifaximin              | Oral          | Anti-anaerobic | Broad spectrum  |
| Daptomycin             | Intravenous   | Anti-aerobic   | Narrow spectrum |

**Table S3. Association between pre-vaccination use of different classes of antibiotics and COVID-19 outcomes after vaccination with three doses of BNT162b2/CoronaVac**

|                                                                      | Events | Person-days | No. of persons | Incidence rate<br>(per 100,000<br>person-days) | Adjusted IRR (95% CI) |
|----------------------------------------------------------------------|--------|-------------|----------------|------------------------------------------------|-----------------------|
| <i>COVID-19</i>                                                      |        |             |                |                                                |                       |
| Never users                                                          | 21110  | 66365213    | 171169         | 31.8                                           | -                     |
| Penicillins                                                          | 20021  | 53458790    | 140883         | 37.5                                           | 1.17 (1.15-1.19)      |
| Cephaloporins                                                        | 679    | 1779927     | 5306           | 38.1                                           | 1.12 (1.04-1.21)      |
| Macrolides                                                           | 1133   | 3062706     | 7850           | 37.0                                           | 1.12 (1.05-1.19)      |
| Carbapenems                                                          | 169    | 325332      | 1179           | 51.9                                           | 1.35 (1.16-1.58)      |
| Monobactams                                                          | 0      | 843         | 3              | 0                                              | -                     |
| Quinolones                                                           | 2513   | 6559990     | 18024          | 38.3                                           | 1.16 (1.11-1.21)      |
| Tetracyclines                                                        | 1004   | 2662873     | 7048           | 37.7                                           | 1.20 (1.13-1.28)      |
| Aminoglycosides                                                      | 55     | 108485      | 354            | 50.7                                           | 1.45 (1.11-1.89)      |
| Nitroimidazoles                                                      | 1339   | 4255760     | 10342          | 31.5                                           | 1.04 (0.98-1.10)      |
| Glycopeptides                                                        | 82     | 183190      | 668            | 44.7                                           | 1.14 (0.92-1.42)      |
| Others                                                               | 1751   | 4693043     | 12472          | 37.3                                           | 1.20 (1.14-1.26)      |
| <i>COVID-19-related hospitalization</i>                              |        |             |                |                                                |                       |
| Never users                                                          | 1550   | 70426545    | 171169         | 2.2                                            | -                     |
| Penicillins                                                          | 2433   | 57145992    | 140883         | 4.3                                            | 1.75 (1.64-1.87)      |
| Cephaloporins                                                        | 161    | 1887260     | 5306           | 8.5                                            | 2.08 (1.77-2.46)      |
| Macrolides                                                           | 92     | 3279104     | 7850           | 2.8                                            | 1.33 (1.07-1.65)      |
| Carbapenems                                                          | 73     | 346055      | 1179           | 21.1                                           | 2.65 (2.08-3.37)      |
| Monobactams                                                          | 0      | 843         | 3              | 0                                              | -                     |
| Quinolones                                                           | 456    | 6992431     | 18024          | 6.5                                            | 2.18 (1.96-2.42)      |
| Tetracyclines                                                        | 160    | 2840762     | 7048           | 5.6                                            | 2.04 (1.73-2.40)      |
| Aminoglycosides                                                      | 16     | 116588      | 354            | 13.7                                           | 3.36 (2.04-5.53)      |
| Nitroimidazoles                                                      | 91     | 4512510     | 10342          | 2.0                                            | 1.46 (1.18-1.8)       |
| Glycopeptides                                                        | 40     | 192094      | 668            | 20.8                                           | 2.68 (1.95-3.69)      |
| Others                                                               | 227    | 5006170     | 12472          | 4.5                                            | 1.97 (1.71-2.27)      |
| <i>Severe COVID-19 (ICU admission / ventilatory support / death)</i> |        |             |                |                                                |                       |
| Never users                                                          | 78     | 70655136    | 171169         | 0.1                                            | -                     |
| Penicillins                                                          | 118    | 57520763    | 140883         | 0.2                                            | 1.62 (1.22-2.16)      |
| Cephaloporins                                                        | 6      | 1912331     | 5306           | 0.3                                            | 1.43 (0.62-3.31)      |
| Macrolides                                                           | 3      | 3294143     | 7850           | 0.1                                            | 0.96 (0.30-3.08)      |
| Carbapenems                                                          | 4      | 358083      | 1179           | 1.1                                            | 2.57 (0.92-7.20)      |
| Monobactams                                                          | 0      | 843         | 3              | 0                                              | -                     |
| Quinolones                                                           | 19     | 7060202     | 18024          | 0.3                                            | 1.75 (1.06-2.91)      |
| Tetracyclines                                                        | 8      | 2865757     | 7048           | 0.3                                            | 1.76 (0.84-3.70)      |
| Aminoglycosides                                                      | 1      | 118600      | 354            | 0.8                                            | 4.21 (0.57-31.16)     |
| Nitroimidazoles                                                      | 1      | 4526997     | 10342          | 0.02                                           | 0.36 (0.05-2.58)      |
| Glycopeptides                                                        | 0      | 198652      | 668            | 0                                              | -                     |
| Others                                                               | 8      | 5041373     | 12472          | 0.2                                            | 1.37 (0.66-2.84)      |

IRR: incidence rate ratio; CI: confidence interval
